# Supplementary material for: The Intestinal Archaea Methanosphaera stadtmanae and Methanobrevibacter smithii Activate Human Dendritic Cells
Source: PubMed Central journal article supplement (PMC4051749; doi:10.1371/journal.pone.0099411), 2014-06-10
Supplement: pone.0099411.s001.pdf [file pone.0099411.s001.pdf]

Figure SI 1

**A**

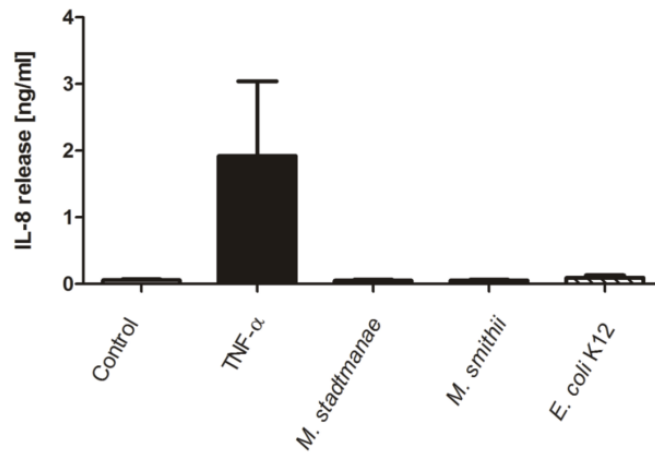

**B**

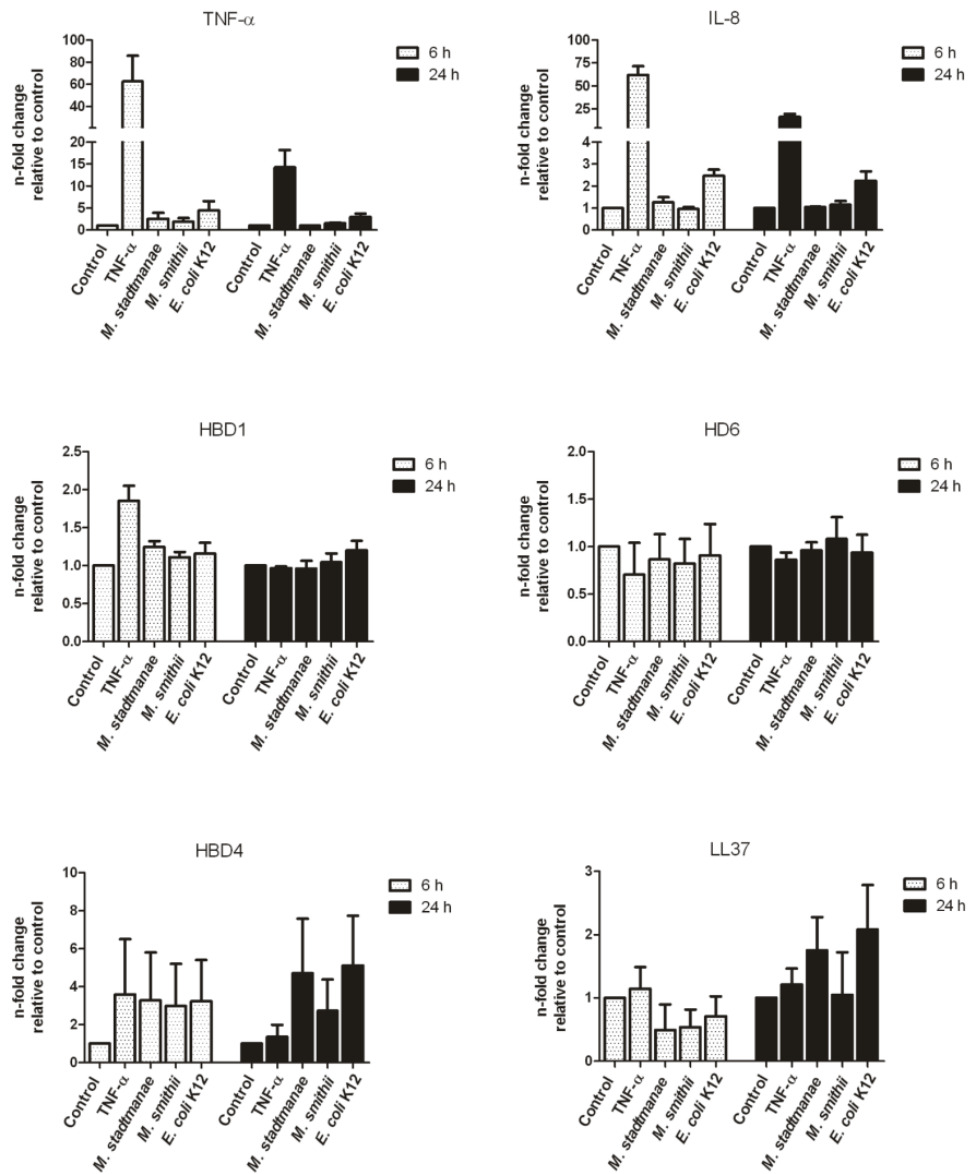

**Figure SI 1 Stimulation of intestinal epithelial cells does not reveal activation by**

***M. stadtmanae* and *M. smithii***

**A)** Cytokine release after stimulation of  $1 \times 10^5$  Caco-2/BBE cells with  $1 \times 10^7$  *M. stadtmanae* or *M. smithii* cells for 20 h was quantified using commercial ELISA-Kits. TNF- $\alpha$  (10 ng/ml), medium and  $1 \times 10^7$  *E. coli* K12 were used as controls. Stated data are means of 3 independent biological replicates with their respective standard errors of the mean (SEM). **B)**  $1 \times 10^6$  Caco-2/BBE cells were stimulated with  $1 \times 10^7$  *M. stadtmanae* or *M. smithii* cells, TNF- $\alpha$  (10 ng/ml), medium and  $1 \times 10^7$  *E. coli* K12 cells (for control) over periods of 6 h and 24 h. After RNA isolation (Macherey-Nagel) and reverse transcription the relative quantification of TNF- $\alpha$ , IL-8, HBD1, HD6, HBD4 and LL37 mRNA expression was carried out in relation to house-keeping gene *hprt* calculated with the LightCycler® 480 Software. Stated data are means of 3 independent biological replicates with their respective SEM.
