# Supplementary material for: The Intestinal Archaea Methanosphaera stadtmanae and Methanobrevibacter smithii Activate Human Dendritic Cells
Source: PubMed Central journal article supplement (PMC4051749; doi:10.1371/journal.pone.0099411), 2014-06-10
Supplement: pone.0099411.s002.pdf [file pone.0099411.s002.pdf]

**Figure SI 2**

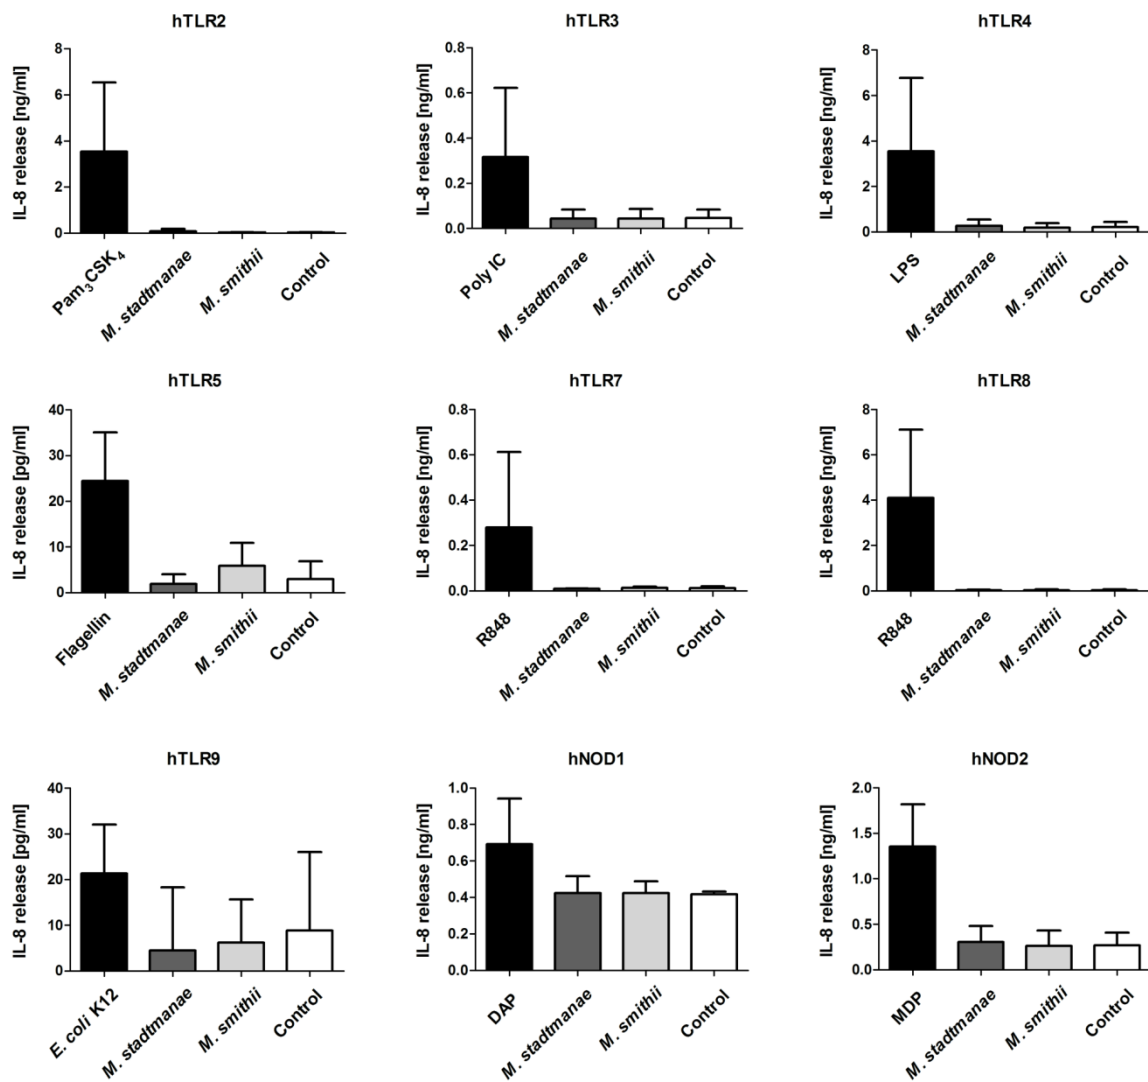

**Figure SI 2** Transfection of HEK293 cells with common TLRs or NLRs does not reveal activation by *M. stadtmanae* or *M. smithii* via these receptors

$2.5 \times 10^4$  HEK cells were transfected with various common human innate immune receptors as indicated. Cells were then stimulated with  $1 \times 10^7$  *M. stadtmanae* and *M. smithii* cells or the indicated control stimuli (Pam3CSK4, Pam3Cys-Ser-(Lys)4; Poly IC, polyriboinosinic:polyribocytidylic acid; LPS, lipopolysachharide; R848, resiquimod; DAP, *diaminopimelic acid*; MDP, *muramyl dipeptide*) for 20 h and IL-8 release was quantified using a commercial ELISA-Kit. Stated data are means of at least 3 independent biological replicates with their respective SEM.
